1 **Oxidative and cardiovascular stress among professional divers in Egypt**

2

3 **Hanie Salah<sup>1</sup>, Ragaa M. El-Gazzar<sup>1</sup>, Ekram W. Abd El-Wahab<sup>2^</sup>, Fahmy Charl<sup>1</sup>**

4 <sup>1</sup> Department of Occupational Health and Air Pollution (Division of Occupational Hygiene and Air Pollution), High Institute  
5 of Public Health, Alexandria University, Alexandria, Egypt

6 <sup>2</sup> Department of Tropical Health, High Institute of Public Health, Alexandria University, Alexandria, Egypt

7

8 **^To whom correspondence should be addressed:**

9 **Ekram Wassim Abd El-Wahab**

10 Address: Tropical Health Department, High Institute of Public Health

11 165 El-Horreya Road, 21561 Alexandria, Egypt

12 Email: [ekram.wassim@alexu.edu.eg](mailto:ekram.wassim@alexu.edu.eg)

13 Tel: +201110456072

14

15 **Running title:** Oxidative and cardiovascular stress in divers

16

17

18

19

20 **Abstract**

21 **Objectives:** Professional divers are exposed to unique multifactorial hazards in their working  
22 environment and cardiovascular effects are tremendous. Cardiovascular events are aggravated by  
23 diving-induced oxidative stress and account for one fourth of diving fatalities. The aim of this study  
24 was to assess the oxidative and cardiovascular stress in a group of professional divers in Alexandria,  
25 Egypt using a panel of biomarkers.

26 **Methods:** A comparative cross-sectional study was conducted between June 2017 and May 2018 at  
27 the General Naval Hospital in Alexandria. We recruited 50 professional divers (n=50) and a  
28 comparison group of 50 marine seafarers sharing similar maritime environments. Participants were  
29 clinically evaluated by electrocardiography (ECG) and assessment of some trace metals (Fe<sup>+</sup>, Cu<sup>+</sup> and  
30 Zn<sup>+</sup>) and oxidative stress biomarkers (OSBMs; MDA, TAS, GST, GSH, GR, GPx, SOD and CAT).

31 **Results:** Significant ECG abnormalities including short corrected QT interval, sinus bradycardia, left  
32 ventricular hypertrophy, early repolarization, 1<sup>st</sup> degree heart block, intraventricular conduction defect  
33 were obvious among divers. The mean levels of FBG, LDH-C, Na<sup>+</sup>, Ca<sup>+</sup>, trace metals and OSBMs  
34 were significantly higher among professional divers compared to the marine seafarers ( $p < 0.5$ ).

35 **Conclusion:** The risk of CVD in professional divers is alarmingly high and possibly contributed by  
36 OS. Including cardiovascular risk assessment in divers' periodic examinations is of utmost  
37 importance.

38

39 **Keywords:** Professional diving; cardiovascular risk assessment; oxidative stress; trace metals;  
40 electrocardiography

41

## 42 INTRODUCTION

43 Divers are employed in a wide range of activities, and all share unique hazards of their working  
44 environment <sup>1</sup>. Diving exposes a body to an unnatural hyperbaric environment which can lead to  
45 increased gas dissolved in the tissues <sup>2</sup>. The diving environment involves various stress factors  
46 including excess physical exercise demands, hemodynamics changes, thermal and mental stresses.  
47 Therefore, the disorders affecting divers are not limited to gas toxicity but can affect locomotion,  
48 respiration, circulation, kidney excretory and nervous systems <sup>3</sup>.

49 Cardiovascular disease (CVD) has been identified as a possible contributing event to diving-  
50 related fatalities <sup>4-7</sup>. Oxidative stress (OS) and chronic elevation of reactive oxygen species (ROS) is  
51 an additional contributing risk for cardiovascular disorders among divers <sup>8</sup>. Indeed, when free radicals  
52 of nitrogen and oxygen species are increased, they damage the lipoproteins, DNA, lipids and proteins  
53 of cell structures. Thus, OS is mainly assessed by measuring oxidative stress biomarkers (OSBMs)  
54 which include malonyldialdehyde (MDA), glutathione (GH), reduced glutathione (GSH), glutathione  
55 peroxidase (GPx), glutathione reductase (GRH), catalase enzyme, and superoxide dismutase (SOD) <sup>9</sup>.

56 Likewise, trace metals are key players in the pathogenesis and evolution of in CVDs. Iron (Fe+),  
57 Copper (Cu+), and zinc (Zn+) are crucial for cardiovascular health and fitness. Their levels in the  
58 blood are disturbed in established CVDs <sup>10,11</sup>. Trace elements are emerging novel tools for risk  
59 assessment of divers and its correlation with CVDs and OS <sup>11,12</sup>.

60 The classical diver fitness and risk assessment in the pre-placement and periodic exam utilizes  
61 conventional tools stressing lipid risk factors and in some occasions cardiac stress factors without  
62 considering the early biomarkers of the increased risk among professional divers.

63 Accordingly, we will proceed in this study is to explore diving effects on some OSBMs and trace  
64 elements that may affect fitness and cardiovascular risk among professional divers compared to  
65 marine seafarers.

66

## 67 METHODS

### 68 Study setting, design and population

69 We conducted a comparative cross-sectional study between June 2017 and May 2018 at general  
70 naval hospital in Alexandria and authorized clinics for diving medical physicians. The target  
71 population comprised the national occupational professional male divers, fishermen divers, and  
72 freelance divers at different governmental and private companies and associations in Egypt.  
73 Accordingly, we recruited a representative sample of eligible professional divers and a second group  
74 of non-diver marine workers matched in their socio-demographics and sharing the whole maritime  
75 environment but not exposed to diving hazards at their workplace. Professional divers and marines  
76 seek medical fitness examination at the general naval hospital in Alexandria as a prerequisite for  
77 obtaining and/or renewal of their marine passport. For eligibility criteria, we included male divers in  
78 the age group 30-45 years, certified as professional divers with a diving license > 5 years, had

79 accomplished at least 2 dives/month within decompression limits during the last year before  
80 examination, and having a valid complete signed logbook recording of: i) the diver medical fitness  
81 certificate (valid and signed by authorized diving medical doctor), ii) history of diving including the  
82 number of dives, maximum depth, maximum duration, diving bottom time, type of gas used in diving  
83 and diving plan. We excluded from the study divers and mariners with new overt CV symptoms,  
84 diabetes mellitus (DM), or any chronic inflammatory diseases such as rheumatoid arthritis,  
85 osteoarthritis, or any other musculoskeletal disorders.

## 86 **Sampling**

87 Using G power 3.0.10, and based on a previous study on CVR factor assessment in professional  
88 divers<sup>13</sup>, the minimum required sample size was 46 for each group. However, we ultimately enrolled  
89 50 participants in each group. All eligible professional divers and seafarers fulfilling the inclusion  
90 criteria and accepted to participate in the study were consecutively enrolled until the required sample  
91 size was achieved.

## 92 **Clinical and laboratory assessments**

93 All enrolled participants were interviewed for full occupational and medical history using a  
94 predesigned questionnaire form to collect background information on sociodemographics, lifestyle,  
95 physical activity and exercise, type of professional activity, number of professional and recreational  
96 dives during the last year; average and maximum depths and average and maximum durations, family  
97 and past medical history for relevant medical conditions to exclude co-morbidities.

98 The smoking index was calculated for current smokers by multiplying the number of cigarettes  
99 per day and the number of smoking years<sup>14</sup>. Subjects were classified into either smoker [those who  
100 had smoked more than 100 cigarettes in their lifetime and currently still smoking or non-smoker  
101 [those who had not smoked more than 100 cigarettes and currently not smoking].

102 All divers were clinically evaluated by complete physical examinations (anthropometric  
103 measurements, complete general and systemic examination). Systemic clinical examination was done  
104 with a special emphasis on the cardiovascular system including resting heart rate, respiratory rate and  
105 blood pressure measurements that were done according to the standard procedures<sup>15</sup>.

## 106 **Electrocardiography**

107 A 12 lead surface electrocardiogram (ECG) was done for all patients in the supine position using a  
108 ECG device. The 12 lead ECG was recorded at a paper speed of 25 mm/s and 1 mV/cm  
109 standardization. The following data were noted: Rate/min, P–R interval (msec), QRS complex (msec),  
110 QT wave (msec), R–R minimum and R–R maximum which is the measurement of the long lead II  
111 during deep inspiration and the Sokolov of the precordial chest leads.

112 The corrected QT wave interval was calculated by the equation developed by Chenoweth et al.:  
113 The corrected QT = QT Interval /  $\sqrt{\text{RR Interval}}$ <sup>16-18</sup>.

114 The main ECG criteria for left ventricular hypertrophy (LVH), including Sokolov-Lyon and  
115 Cornell Voltage indices, were calculated for all included individuals. The LVH was detected using the  
116 following formula: Sokolov-Lyon criteria=  $S_{1/2} + R_{5/6} > 35$  <sup>19-21</sup>

### 117 **Blood sampling**

118 A five milliliter of venous blood was collected aseptically from each participant in a vacutainer  
119 tube containing citrate or EDTA as anticoagulant. Tubes containing blood were centrifuged at 700 –  
120 1000  $\times g$  for 10 minutes at 4°C. Top yellow plasma layer was pipetted off without disturbing the white  
121 buffy coat. The white buffy layer was then removed and discarded.

122 The RBCs were lysed in 4 times its volume of ice-cold HPLC grade water. The lysate was  
123 centrifuged at 100,000  $\times g$  for 15 minutes at 4°C. The collected plasma or erythrocyte lysate were  
124 stored on ice until assaying on the same day was done or frozen at – 80 °C, thus samples can be left  
125 stable for at least one month.

### 126 **Biochemical tests**

127 Biochemical analyses including fasting blood glucose (FBG), lipid profile [total cholesterol (TC),  
128 triglycerides (TG), high density lipoprotein cholesterol (HDL-C), low density lipoprotein cholesterol  
129 (LDL-C)], kidney function tests (blood urea, creatinine and uric acid), liver function tests (serum  
130 glutamic oxaloacetic transaminase (SGOT/ALT), serum glutamate-pyruvate transaminase  
131 (SGPT/AST) and serum bilirubin) and serum electrolytes ( $Na^+$ ,  $K^+$ ,  $Ca^{+}$ ,  $Na^+/K^+$  ratio) were done  
132 according to the standard laboratory procedures described by Poppiti and Sellers <sup>22</sup>.

### 133 **Assessment of oxidative stress biomarkers**

134 Maloney dialdehyde (MDA) <sup>23</sup>, Superoxide dismutase enzyme (SOD) <sup>24</sup>, Catalase enzyme (CAT)  
135 <sup>25</sup>, Glutathione peroxidase (GPx) <sup>26</sup>, Glutathione reductase (GHR) <sup>27</sup>, Glutathione transferase (GST) <sup>28</sup>,  
136 Reduced glutathione (GSH) <sup>29</sup>, and total antioxidant status (TAS) <sup>30</sup> were assayed as previously  
137 described.

### 138 **Assessment of trace metals**

139 Plasma trace metal levels of  $Fe^+$ ,  $Zn^+$  and  $Cu^+$  were analyzed by the colorimetric technique  
140 described by Kim and co-workers <sup>31</sup>.

### 141 **Statistical data analysis**

142 Data were fed to the computer and analyzed using IBM SPSS software package version 20.0  
143 (Armonk, NY: IBM Corp). The Kolmogorov-Smirnov test was used to verify the normality of  
144 distribution of the different variables. Qualitative data were described using number and percent.  
145 Quantitative data was described using mean and standard deviation (SD). Chi-square test was used for  
146 categorical variables to compare between different groups. Fisher's Exact test (FET) was used as a  
147 correction for chi-square when more than 20% of the cells have expected count less than 5. For  
148 normally distributed quantitative variables, *t*-test was used to compare between two studied groups.  
149 Pearson coefficient was used to correlate between two normally distributed quantitative variables.  
150 Mann Whitney U test was used for abnormally distributed quantitative variables to compare between

151 the two studied groups. Wilcoxon signed ranks test was used for abnormally distributed quantitative  
152 variables to compare between two time periods. Significance of the obtained results was judged at the  
153 5% level.

154

## 155 **RESULTS**

156

### 157 **Sociodemographics and clinical data of the enrolled divers and seafarers**

158 The mean age of divers was  $36.48 \pm 6.08$  years, while that of the marine seafarers was ( $37.05 \pm$   
159  $5.16$ ) years, ( $p = 0.615$ ). The average employment duration for divers was comparable for that of the  
160 controls ( $13.10 \pm 8.43$  vs  $13.0 \pm 7.6$  years, respectively).

161 Family history of CVD and/or DM was more frequently reported in the diver group than the  
162 seafarers although the differences between the two groups for both conditions were not statistically  
163 significant ( $p = 0.181$  and  $p = 0.198$  respectively).

164 A considerable number of the professional divers and marine seafarers were smokers, although  
165 the pattern of smoking did not differ significantly between the two studied groups ( $p > 0.05$ ).

166 The mean ( $\pm$ SD) BMI of the professional divers was  $26.7 \pm 3.7$  with the majority being  
167 overweight. Type I obesity was prevailing among marine seafarers as evidenced by higher BMI, waist  
168 circumference and Waist\Height ratio compared to the professional divers ( $p < 0.05$ ). On the other  
169 hand, the divers showed a statistically significant higher mean SBP compared to the marines [ $131.18$   
170  $\pm 14.06$  vs  $124.3 \pm 15.84$  respectively, ( $p = 0.02$ )] (Table 1).

### 171 **Biochemical changes among the study participants**

172 The mean FBS level differed significantly among the divers and seafarers [ $89.0 \pm 12.46$  vs  
173  $100.5 \pm 29.03$  mg/dl, ( $p = 0.012$ )], though the levels were still within normal reference ranges (56-110  
174 mg/dl). Likewise, renal function tests (blood urea, creatinine and uric acid levels) and liver function  
175 tests (SGOT, SGPT and serum bilirubin) were comparable between the two groups and within normal  
176 reference ranges ( $p > 0.05$ ).

177 Regarding the lipid profile, the mean plasma levels of TC, TG and LDL-C were comparable  
178 between the professional divers and seafarers ( $p > 0.05$ ). On the other hand, the professional divers  
179 showed higher mean HDL-C levels compared to the seafarers [ $41.46 \pm 4.01$  vs  $39.34 \pm 4.34$   
180 respectively, ( $p = 0.013$ )] (Table 2).

### 181 **Biomarkers of oxidative stress**

182 Regarding lipid peroxidation, the mean MDA level was high in both groups compared to its  
183 reference range (0.67-2.44  $\mu$ ml), although it was significantly higher among the professional divers  
184 compared to the seafarers [ $13.54 \pm 4.08$  vs  $6.31 \pm 2.66$   $\mu$ ml, ( $p < 0.001$ )].

185 As for the antioxidant system, the TAS did not increased in both groups. Its mean level  
186 remained within the normal reference range (0.5–2.0  $\mu$ ml), although it was significantly lower in the  
187 divers than in the marine seafarers [ $0.84 \pm 0.43$  vs  $1.40 \pm 0.45$   $\mu$ ml respectively, ( $p < 0.001$ )]. The

188 mean CAT, GPx, GSH, GR, and GST enzyme levels were significantly reduced in the professional  
189 divers ( $p < 0.001$ ). On the other hand, the mean SOD level was high in both groups compared to the  
190 reference range (100 U/ml), although it was significantly higher among controls compared to the  
191 professional divers [ $140.5 \pm 27.59$  vs  $243.2 \pm 40.19$  U/ml, ( $p < 0.001$ )] (Table 2).

#### 192 **Trace metals**

193 The mean  $\text{Fe}^+$  level was significantly lower among the professional divers than in the controls  
194 [ $101.1 \pm 38.17$  vs  $147.6 \pm 38.08$   $\mu\text{m/dl}$ , ( $p < 0.001$ )]. Similarly, the mean level of  $\text{Zn}^+$  was significantly  
195 lower among the professional divers than in the seafarers [ $85.52 \pm 27.37$  vs  $116.6 \pm 21.95$   $\mu\text{m/dl}$ , ( $p$   
196  $< 0.001$ )]. Conversely, the professional divers showed higher mean level of  $\text{Cu}^+$  compared to the  
197 seafarers [ $271.3 \pm 75.01$  vs  $100.8 \pm 30.20$   $\mu\text{m/dl}$ , ( $p < 0.001$ )] (Table 2).

#### 198 **Electrolyte profile**

199 The mean plasma  $\text{Na}^+$ ,  $\text{K}^+$ , and  $\text{Ca}^+$  levels were comparable between the divers and the  
200 seafarers ( $9.44 \pm 0.52$ ,  $4.20 \pm 0.39$  and  $141.72 \pm 3.53$  vs  $9.19 \pm 0.60$ ,  $4.26 \pm 0.34$  and  $143.26 \pm 3.99$   
201 mmol/L respectively) although the differences for  $\text{Ca}^+$  and  $\text{Na}^+$  between the two groups were  
202 statistically significant ( $p = 0.030$  and  $p = 0.044$  respectively). On the other hand, the mean  $\text{Na}^+/\text{K}^+$   
203 ratio did not differ significantly between the two groups [ $34.04 \pm 3.08$  vs  $33.82 \pm 3.06$  mmol/L, ( $p =$   
204  $0.720$ )] (Table 2).

#### 205 **Quantitative ECG changes in the enrolled professional divers and seafarers**

206 Abnormal ECG changes were found in 22 divers (44.0%) and 7 seafarers (14.0%). The mean  
207 heart rate ( $\pm$  SD) was significantly slower among the professional divers compared to the seafarers  
208 ( $68.90 \pm 16.06$  vs  $78.16 \pm 15.42$  beat/min respectively,  $p = 0.004$ ), although both values were still  
209 within the normal range. The professional divers showed more prolonged mean ( $\pm$ SD) P-R interval  
210 [ $168.8 \pm 28.62$  vs  $140.8 \pm 21.37$  msec respectively, ( $p < 0.001$ )] and QRS [ $85.20 \pm 20.92$  vs  $75.60 \pm$   
211  $17.75$  msec respectively, ( $p = 0.002$ )] compared to the seafarers. There was no significant difference  
212 between the two groups regarding the mean QT segment ( $p = 0.658$ ), although the mean ( $\pm$ SD)  
213 corrected QT segment differed significantly among the professional divers and the seafarers [ $392.1 \pm$   
214  $22.67$  vs  $412.5 \pm 37.76$  msec respectively, ( $p = 0.002$ )]. The mean Sokolov–Lyon score ( $S_{1/2} + R_{5/6}$ ) was  
215 significantly higher in the professional divers ( $22.68 \pm 6.18$  mV) than in the controls ( $12.50 \pm 4.09$   
216 mV) ( $p < 0.001$ ). Likewise, the R-R interval, the R-R, the R-R maximum and the mean R-R, all  
217 significantly differed among both groups ( $p < 0.001$ ) (Table 3).

#### 218 **Qualitative ECG changes in the enrolled professional divers and seafarers**

219 The most common variations among the professional divers were sinus bradycardia (22.0%),  
220 LVH (18.0%), left axis deviations (14.0%), early repolarization (14.0%), athletes heart P-mitrale  
221 (8.0%), first degree heart block (8.0%), intraventricular conduction defect (6.0%), Right bundle  
222 branch block (RBBB) (4.0%), P-Pulmonale (4.0%), T wave inversion (4.0%), right axis deviation  
223 (2.0%), prolonged QT (2.0%), Burgada like syndrome (2.0%), peaked T wave (2.0%), and sinus  
224 tachycardia (2.0%). The overall variations in the studied divers were more common in both number

225 and context compared to the marine seafarers. The latter mainly showed sinus tachycardia (6.0%),  
226 LVH (6.0%), P-pulmonale (6.0%), left axis deviation (4.0%), tented T- wave (4.0%), RBBB (4.0%)  
227 and early repolarization (2.0%) (Table 3).

## 228 **DISCUSSION**

229 In the present study, we used a multimarkers approach to assess the cardiovascular and OS in  
230 professional divers. Our panel of biomarkers included some OSBMs, trace metals, electrolytes and  
231 electrophysiologic changes in the ECG.

232 The study population of professional divers and seafarers were found matched as regards their  
233 age, duration of employment as well as the history of smoking and their family history of CVDs and  
234 DM. Overweight and obesity were common features among seafarers although the percentage was  
235 also high among divers. This was also reported in a study done in France on 200 professional divers  
236 where 43.6% of divers were overweight or obese<sup>21</sup>. Also, in a study measuring the BMI in 1115  
237 German and Italian sailors, approximately 40% of evaluated subjects were overweight, and more than  
238 the 10% of them were obese<sup>32</sup>. The relative differences in BMI could reflect the increased physical  
239 activities done by professional divers during their tasks and different lifestyles led by seafarers.

240 Increased BMI was previously reported to be associated with an increase in the 10 years and  
241 lifetime risks of CVD<sup>33-35</sup>. The mean WHtR was significantly lower in divers than in controls and  
242 correlated with prolonged corrected QT interval which reflects disturbance in the electrophysiologic  
243 status. This is agreed with the previous studies that reported WHtR as a predictor of CVD risk<sup>35-39</sup>.

244 The BP was obviously elevated in most participants albeit with a higher percentage among  
245 divers. This came in agreement with other studies where the percentage of high BP among divers  
246 varied between 6.5% and 64.0%<sup>21,40</sup>. Increased prevalence of high SBP was also reported among  
247 seafarers in Denmark (44.7%)<sup>41</sup> and Germany (33.8%)<sup>42</sup>. This may be due to the higher OS caused  
248 by diving.

249 Apart from HDL-C, lipid profile measurements did not differ significantly between the two  
250 study groups where levels remained within normal ranges. This contradicts reports in other studies  
251 that TC was raised in 50% of professional divers<sup>21</sup>. Another study reported higher TG levels among  
252 41.6% of seafarers<sup>43</sup>.

253 Liver and kidney function tests together with uric acid were within normal ranges among the  
254 two studied groups. This means that there were no kidney or liver conditions that could influence the  
255 other assessed laboratory parameter particularly OSBMs and trace metals which can reflect liver and  
256 kidney diseases<sup>44,45</sup>. Likewise, normal mean FBS but significantly lower among divers than seafarers  
257 could reflect excess physical efforts done by divers during their tasks and to a less extent to the diving  
258 environment as postulated in similar studies<sup>46,47</sup>.

259 The ECG is necessary for early diagnosis of cardiovascular pathology. Few studies addressed  
260 the qualitative changes of the ECG. In the present study, the professional divers showed 5 times



261 higher Odds of having electrophysiological changes compared to marine seafarers. Sinus bradycardia,  
262 LVH, early repolarization, 1<sup>st</sup> degree heart block, intraventricular conduction defect were obvious  
263 changes. Indeed, the high ambient pressure and increased gas densities can lead to cardiac  
264 decompensation. Sinus arrhythmia is frequent in athletes as a result of strenuous exercise whereas  
265 other changes are considered to be pathological <sup>48</sup>. In a study done on 225 randomly selected  
266 professional divers, significant ECG abnormalities such as incomplete IRBBB, right QRS axis  
267 deviation, sinus tachycardia, early repolarization, ventricular extrasystoles, ST elevation and sinus  
268 arrhythmia and T-wave inversion were reported <sup>49</sup>. In fact, electrophysiological changes are important  
269 clues as they are more likely to precipitating or aggravate arrhythmias in divers and hence more  
270 relevant etiological factor for cardiac related deaths rather than ischemic coronary vascular changes <sup>50-</sup>  
271 <sup>53</sup>. Adding electrophysiological changes to the CVR assessment will help also in risk stratification. It  
272 is worth noting that no other studies described corrected QT wave except a single recent study done  
273 by Zizaziabari et al., in 2019. They reported significant change in the pulse rate, corrected QT, and T  
274 wave before and after diving but did not define a cutoff point <sup>54</sup>. ECG changes were also found to be a  
275 more specific biomarkers as OS changes could occur in other physiological and pathological  
276 conditions <sup>20</sup>. ECG changes as a biomarker are characterized by large availability, simple  
277 interpretation, and cost-effectiveness and should therefore be preferred in the CVD risk assessment <sup>20</sup>.

278 Evidence for increased OS was found in both studied groups as manifested by abnormal levels  
279 of OSBMs. This was more obvious among divers compared to seafarers and came in agreement with  
280 many studies which spotted increased OS to be associated with increased cardiovascular risks and  
281 hypertension <sup>55-58</sup>. Other studies showed that the assessed CVR was higher the higher the OS levels  
282 was <sup>59</sup>. Meanwhile, the current results support the postulation that diving and exercises increase the  
283 OS in divers <sup>60,61</sup>. Remarkably, MDA, SOD, GST and TAS were more sensitive in reflecting OS than  
284 other biomarkers where they demonstrated the highest percent of changes compared to the normal  
285 references values.

286 The role of trace metals and OS in the pathogenesis of CVDs is well established <sup>62-64</sup>. Also, OS is  
287 linked to increased levels of Cu<sup>+</sup> and decreased levels of Fe<sup>+</sup> and Zn<sup>+</sup> <sup>64-66</sup>. This was in concordance with  
288 the present work, where the levels of Fe<sup>+</sup> and Zn<sup>+</sup> were significantly lower in divers compared to  
289 seafares whereas the level of Cu<sup>+</sup> was significantly higher. Few research mentioned the effect of diving  
290 on trace metals especially the saturation deep diving which affects the hemoglobin iron level <sup>67</sup>.

291 In the present study, the mean serum electrolyte (Ca<sup>+</sup>, Na<sup>+</sup> and K<sup>+</sup>) levels among the two groups  
292 were within the normal references values, although higher level of Ca<sup>+</sup> and lower level of Na<sup>+</sup> were  
293 seen in the professtional divers compared to the seafareres. A recent study showed that high blood Ca<sup>+</sup>  
294 level may increases arterial wall stiffness and subsequently the 10 years CVD risk as assessed by the  
295 Farmingham score <sup>68</sup>. This might represent another novel factor which can lead to increase in the  
296 CVD risk. Indeed, hyponatrimia may be attributed to the repeated physical activity done by divers

297 during their work and the physical effect of diving in agreement with statements of Luhker and  
298 Rosner<sup>69,70</sup>.

299 In conclusion, cardiovascular stress in professional divers is alarmingly high and OS as well as  
300 trace metal imbalance are possible contributing factors.

301 The electrophysiological changes of the cardiac activities detected by ECG are powerful CVD  
302 biomarkers. Furthermore, OS and trace metal levels are linked to the pathophysiology of CVDs and  
303 together with electrophysiological changes of ECG could be validated as biomarkers for CVR  
304 assessment.

305

306

### 307 **Ethical considerations**

#### 308 **Ethical approval**

309 The study was approved by the institutional review board and the Ethics Committee of the High  
310 Institute of Public Health-Alexandria University. The research was conducted in accordance with the  
311 ethical guidelines of Helsinki's Declaration (2013). Data sheets were coded with numbers to maintain  
312 the anonymity and confidentiality of patient's data.

313 This article does not contain any studies with animals performed by any of the authors.

314 **Informed consent:** All participants signed an informed written consent after explaining the aim and  
315 concerns of the study.

316 **Funding:** None

317 **Conflict of interest:** None to declare

318

319 **References**

- 320 1. Mitchell S, Bennett M. Clearance to dive and fitness for work. In: Neuman T, Thom S,  
321 editors. The physiology and medicine of hyperbaric oxygen therapy. Philadelphia, PA: Saunders;  
322 2008. p. 65-94.
- 323 2. Pendergast DR, Lundgren CE. The physiology and pathophysiology of the hyperbaric and  
324 diving environments. *J Appl Physiol* (1985). 2009 Jan;106(1):274-5.
- 325 3. Levett DZ, Millar IL. Bubble trouble: a review of diving physiology and disease. *Postgrad*  
326 *Med J*. 2008 Nov;84(997):571-8.
- 327 4. Denoble PJ, Caruso JL, Dear Gde L, Pieper CF, Vann RD. Common causes of open-circuit  
328 recreational diving fatalities. *Undersea Hyperb Med*. 2008 Nov-Dec;35(6):393-406.
- 329 5. Mitchell SJ, Bove AA. Medical screening of recreational divers for cardiovascular disease:  
330 consensus discussion at the Divers Alert Network Fatality Workshop. *Undersea Hyperb Med*. 2011  
331 Jul-Aug;38(4):289-96.
- 332 6. Bove AA. The cardiovascular system and diving risk. *Undersea Hyperb Med*. 2011 Jul-  
333 Aug;38(4):261-9.
- 334 7. Edmonds C, Caruso J. Diving fatality investigations: recent changes. *Diving Hyperb Med*.  
335 2014 Jun;44(2):91-6.
- 336 8. Tirapelli CR. Oxidative Stress and Vascular Disease. *Curr Hypertens Rev*. 2020;16(3):162.
- 337 9. Ceconi C, Boraso A, Cargnoni A, Ferrari R. Oxidative stress in cardiovascular disease: myth  
338 or fact? *Archives of biochemistry and biophysics*. 2003;420(2):217-21.
- 339 10. Shokrzadeh M, Ghaemian A, Salehifar E, Aliakbari S, Saravi SSS, Ebrahimi P. Serum zinc  
340 and copper levels in ischemic cardiomyopathy. *Biological trace element research*. 2009;127(2):116.
- 341 11. Valko M, Morris H, Cronin M. Metals, toxicity and oxidative stress. *Current medicinal*  
342 *chemistry*. 2005;12(10):1161-208.
- 343 12. Valko M, Leibfritz D, Moncol J, Cronin MT, Mazur M, Telser J. Free radicals and  
344 antioxidants in normal physiological functions and human disease. *The international journal of*  
345 *biochemistry & cell biology*. 2007;39(1):44-84.
- 346 13. Pougnet R, Costanzo LD, Lodde B, Henckes A, Dherbecourt L, Lucas D, et al.  
347 Cardiovascular risk factors and cardiovascular risk assessment in professional divers. *Int Marit*  
348 *Health*. 2012;63(3):164-9.
- 349 14. Centers for Disease Control Prevention (CDC). Current cigarette smoking among adults in the  
350 United States. USA: CDC; 2016.
- 351 15. Colantonio LD, Booth III JN, Bress AP, Whelton PK, Shimbo D, Levitan EB, et al. 2017  
352 ACC/AHA blood pressure treatment guideline recommendations and cardiovascular risk. *Journal of*  
353 *the American College of Cardiology*. 2018;72(11):1187-97.
- 354 16. Bazett HC. An analysis of the time relations of electrocardiograms. *Heart*. 1920;7:353-70.

- 355 17. Israel SA, Irvine JM, Cheng A, Wiederhold MD, Wiederhold BK. ECG to identify  
356 individuals. *Pattern recognition*. 2005;38(1):133-42.
- 357 18. Chenoweth JA, Hougham AM, Colby DK, Ford JB, Sandhu J, Albertson TE, et al.  
358 Monitoring the corrected QT in the acute care setting: A comparison of the 12-lead ECG and bedside  
359 monitor. *The American journal of emergency medicine*. 2018;36(5):777-9.
- 360 19. Tamama K, Kanda T, Osada M, Nagai R, Suzuki T, Kobayashi I. Detection of left ventricular  
361 enlargement by electrocardiography. *Journal of medicine*. 1998;29(3-4):231-6.
- 362 20. Tocci G, Figliuzzi I, Presta V, El Halabieh NA, Citoni B, Coluccia R, et al. Adding markers  
363 of organ damage to risk score models improves cardiovascular risk assessment: Prospective analysis  
364 of a large cohort of adult outpatients. *International journal of cardiology*. 2017;248:342-8.
- 365 21. Pougnet R, Di Costanzo L, Loddé B, Henckes A, Dherbecourt L, Lucas D, et al.  
366 Cardiovascular risk factors and cardiovascular risk assessment in professional divers. *International*  
367 *maritime health*. 2012;63(3):164-9.
- 368 22. Poppiti JA, Sellers C. *Practical techniques for laboratory analysis*: CRC Press; 1994.
- 369 23. Ishizuka I. Chemistry and functional distribution of sulfoglycolipids. *Progress in lipid*  
370 *research*. 1997;36(4):245-319.
- 371 24. Arafa MH, Mohammad NS, Atteia HH, Abd-Elaziz HR. Protective effect of resveratrol  
372 against doxorubicin-induced cardiac toxicity and fibrosis in male experimental rats. *Journal of*  
373 *physiology and biochemistry*. 2014;70(3):701-11.
- 374 25. Aebi H. Catalase in vitro *Methods Enzymol* 105: 121–126. Find this article online. 1984.
- 375 26. Paglia DE, Valentine WN. Studies on the quantitative and qualitative characterization of  
376 erythrocyte glutathione peroxidase. *The Journal of laboratory and clinical medicine*. 1967;70(1):158-  
377 69.
- 378 27. Goldberg D, Spooner R. *Methods of enzymatic analysis*. Bergmeyer HV. 1983;3:p258-65.
- 379 28. Habig WH, Pabst MJ, Jakoby WB. Glutathione S-transferases the first enzymatic step in  
380 mercapturic acid formation. *Journal of biological Chemistry*. 1974;249(22):7130-9.
- 381 29. Thomas EL, Grisham MB, Jefferson MM. [41] Cytotoxicity of chloramines. *Methods in*  
382 *enzymology*: Elsevier; 1986. p. 585-93.
- 383 30. Koracevic D, Koracevic G, Djordjevic V, Andrejevic S, Cosic V. Method for the  
384 measurement of antioxidant activity in human fluids. *Journal of clinical pathology*. 2001;54(5):356-  
385 61.
- 386 31. Kim KB, Kim H, Song EJ, Kim S, Noh I, Kim C. A cap-type Schiff base acting as a  
387 fluorescence sensor for zinc (II) and a colorimetric sensor for iron (II), copper (II), and zinc (II) in  
388 aqueous media. *Dalton Transactions*. 2013;42(47):16569-77.
- 389 32. Nittari G, Tomassoni D, Di Canio M, Traini E, Pirillo I, Minciacchi A, et al. Overweight  
390 among seafarers working on board merchant ships. *BMC public health*. 2019;19(1):45.

- 391 33. Khan SS, Ning H, Wilkins JT, Allen N, Carnethon M, Berry JD, et al. Association of body  
392 mass index with lifetime risk of cardiovascular disease and compression of morbidity. *JAMA*  
393 *cardiology*. 2018;3(4):280-7.
- 394 34. Lamon-Fava S, Wilson PW, Schaefer EJ. Impact of body mass index on coronary heart  
395 disease risk factors in men and women: the Framingham Offspring Study. *Arteriosclerosis,*  
396 *thrombosis, and vascular biology*. 1996;16(12):1509-15.
- 397 35. Melander O, Newton-Cheh C, Almgren P, Hedblad B, Berglund G, Engström G, et al. Novel  
398 and conventional biomarkers for prediction of incident cardiovascular events in the community. *Jama*.  
399 2009;302(1):49-57.
- 400 36. Cai L, Liu A, Zhang Y, Wang P. Waist-to-height ratio and cardiovascular risk factors among  
401 Chinese adults in Beijing. *PloS one*. 2013;8(7):e69298.
- 402 37. Garg N, Muduli SK, Kapoor A, Tewari S, Kumar S, Khanna R, et al. Comparison of different  
403 cardiovascular risk score calculators for cardiovascular risk prediction and guideline recommended  
404 statin uses. *Indian heart journal*. 2017;69(4):458-63.
- 405 38. Sabah KMN, Chowdhury AW, Khan HLR, Hasan AH, Haque S, Ali S, et al. Body mass  
406 index and waist/height ratio for prediction of severity of coronary artery disease. *BMC research notes*.  
407 2014;7(1):246.
- 408 39. Madden C, Putukian M, McCarty E, Young C. *Netter's Sports Medicine E-Book*: Elsevier  
409 *Health Sciences*; 2013.
- 410 40. Åsmul K, Irgens Å, Grønning M, Møllerløyken A. Diving and long-term cardiovascular  
411 health. *Occupational Medicine*. 2017;67(5):371-6.
- 412 41. Tu M, Jepsen JR. Hypertension among Danish seafarers. *International maritime health*.  
413 2016;67(4):196-204.
- 414 42. Oldenburg M, Jensen H-J, Latza U, Baur X. Coronary risks among seafarers aboard German-  
415 flagged ships. *International archives of occupational and environmental health*. 2008;81(6):735-41.
- 416 43. Oldenburg M. Risk of cardiovascular diseases in seafarers. *International maritime health*.  
417 2014;65(2):53-7.
- 418 44. Romero FJ, Bosch-Morell F, Romero MJ, Jareño EJ, Romero B, Marín N, et al. Lipid  
419 peroxidation products and antioxidants in human disease. *Environmental health perspectives*.  
420 1998;106(suppl 5):1229-34.
- 421 45. Halliwell B, Cross CE. Oxygen-derived species: their relation to human disease and  
422 environmental stress. *Environmental health perspectives*. 1994;102(suppl 10):5-12.
- 423 46. Dear G, Pollock N, Uguccioni D, Dovenbarger J, Feinglos M, Moon R. Plasma glucose  
424 responses in recreational divers with insulin-requiring diabetes. 2004.
- 425 47. Sponsiello N, Cialoni D, Pieri M, Marroni A. Cellular Glucose Uptake During Breath-Hold  
426 Diving in Experienced Male Breath-Hold Divers. *Sports medicine-open*. 2018;4(1):14.

- 427 48. Kiss O, Sydo N, Vargha P, Edes E, Merkely G, Sydo T, et al. Prevalence of physiological and  
428 pathological electrocardiographic findings in Hungarian athletes. *Acta Physiol Hung*. 2015  
429 Jun;102(2):228-37.
- 430 49. Gunes AE, Cimsit M. The prevalence of electrocardiogram abnormalities in professional  
431 divers. *Diving and Hyperbaric Medicine*. 2017;47(1):55-8.
- 432 50. Greenland P, Alpert JS, Beller GA, Benjamin EJ, Budoff MJ, Fayad ZA, et al. 2010  
433 ACCF/AHA guideline for assessment of cardiovascular risk in asymptomatic adults: a report of the  
434 American College of Cardiology Foundation/American Heart Association task force on practice  
435 guidelines developed in collaboration with the American Society of Echocardiography, American  
436 Society of Nuclear Cardiology, Society of Atherosclerosis Imaging and Prevention, Society for  
437 Cardiovascular Angiography and Interventions, Society of Cardiovascular Computed Tomography,  
438 and Society for Cardiovascular Magnetic Resonance. *Journal of the American College of Cardiology*.  
439 2010;56(25):e50-e103.
- 440 51. Boåsson M, Rienks R. Arrhythmogenicity of scuba diving: Holter monitoring in a hyperbaric  
441 environment. *Undersea & hyperbaric medicine: journal of the Undersea and Hyperbaric Medical  
442 Society, Inc*. 2019;46(4):421-7.
- 443 52. Shenasa M, Shenasa H. Hypertension, left ventricular hypertrophy, and sudden cardiac death.  
444 *International journal of cardiology*. 2017;237:60-3.
- 445 53. Denoble PJ. Hypertension, Left Ventricular Hypertrophy and Sudden Cardiac Death in Scuba  
446 Diving. *Wound Care & Hyperbaric Medicine*. 2013;4(3):21-6.
- 447 54. ZiaZiabari SM, Asadi P, Shakiba M, Habibi A, Shokrollahi A, Seidshekan J, et al.  
448 Electrocardiographic Changes in Scuba Divers: A Quasi-Experimental Study in Iran. 2019. [Scuba  
449 diving, Electrocardiography, Heart rate, Iran.]. 2019 2019-09-01;4(4):4-6.
- 450 55. Bastani A, Rajabi S, Daliran A, Saadat H, Karimi-Busheri F. Oxidant and antioxidant status  
451 in coronary artery disease. *Biomedical reports*. 2018;9(4):327-32.
- 452 56. Ho E, Galougahi KK, Liu C-C, Bhindi R, Figtree GA. Biological markers of oxidative stress:  
453 applications to cardiovascular research and practice. *Redox biology*. 2013;1(1):483-91.
- 454 57. Frijhoff J, Winyard PG, Zarkovic N, Davies SS, Stocker R, Cheng D, et al. Clinical relevance  
455 of biomarkers of oxidative stress. *Antioxidants & redox signaling*. 2015;23(14):1144-70.
- 456 58. Birben E, Sahiner UM, Sackesen C, Erzurum S, Kalayci O. Oxidative stress and antioxidant  
457 defense. *World Allergy Organ J*. 2012 Jan;5(1):9-19.
- 458 59. Poredoš P, Ježovnik MK. Markers of preclinical atherosclerosis and their clinical relevance.  
459 *Vasa*. 2015;44(4):247-56.
- 460 60. Perović A, Unić A, Dumić J. Recreational scuba diving: negative or positive effects of  
461 oxidative and cardiovascular stress? *Biochemia medica: Biochemia medica*. 2014;24(2):235-47.
- 462 61. Gorman D, Sames C, Mitchell S. Routine occupational dive medical examinations. 2009.

- 463 62. Momtaz M, Mughal N, SIDDIQUE A, MAHBOOB T. CHANGES IN BLOOD LEVELS OF  
464 TRACE ELEMENTS AND ELECTROLYTES IN HYPERTENSIVE PATIENTS. *Medical Journal*  
465 *of The Islamic Republic of Iran (MJIRI)*. 2000;14(2):115-8.
- 466 63. Nagarajrao R. Study of trace elements and malondialdehyde levels in cardiovascular disease  
467 patients. *Int J Adv Res Biol Sci*. 2014;1(9):25-32.
- 468 64. Osredkar J, Sustar N. Copper and zinc, biological role and significance of copper/zinc  
469 imbalance. *J Clinic Toxicol S*. 2011;3(2161):0495.
- 470 65. Marreiro D, Cruz K, Morais J, Beserra J, Severo J, de Oliveira A. Zinc and oxidative stress:  
471 current mechanisms. *Antioxidants*. 2017;6(2):24.
- 472 66. Sarkar PD, Ramprasad N, Sarkar ID, Shivaprakash T. Study of oxidative stress and trace  
473 element levels in patients with alcoholic and non-alcoholic coronary artery disease. *Indian journal of*  
474 *physiology and pharmacology*. 2007;51(2):141.
- 475 67. Nakabayashi K, Mizukami H, Hashimoto A, Oiwa H. CHANGE IN RED BLOOD CELL  
476 PRODUCTION RATE DURING A 330 MSW SATURATION DIVE SIMULATION. 1991.
- 477 68. Park B, Lee YJ. Borderline high serum calcium levels are associated with arterial stiffness  
478 and 10-year cardiovascular disease risk determined by Framingham risk score. *The Journal of*  
479 *Clinical Hypertension*. 2019;21(5):668-73.
- 480 69. Rosner MH, Kirven J. Exercise-associated hyponatremia. *Clinical Journal of the American*  
481 *Society of Nephrology*. 2007;2(1):151-61.
- 482 70. Lühker O, Berger MM, Pohlmann A, Hotz L, Gruhlke T, Hochreiter M. Changes in acid-base  
483 and ion balance during exercise in normoxia and normobaric hypoxia. *European journal of applied*  
484 *physiology*. 2017;117(11):2251-61.

485

486

487

### List of tables

Table 1: Sociodemographics and clinical data of the enrolled divers and seafarers

| Demographic and medical data               | Divers<br>(n = 50) |    | Marines and<br>Seafarers<br>(n = 50) |    | Test of Sig.         | p       |
|--------------------------------------------|--------------------|----|--------------------------------------|----|----------------------|---------|
|                                            | No.                | %  | No.                                  | %  |                      |         |
| Age (years)                                |                    |    |                                      |    |                      |         |
| Mean ± SD                                  | 36.48 ± 6.08       |    | 37.05 ± 5.16                         |    | t=0.51               | 0.615   |
| Duration of employment (years)             | No.                | %  | No.                                  | %  |                      |         |
| <5                                         | 10                 | 20 | 6                                    | 12 | χ <sup>2</sup> =294  | 0.23    |
| 5 - <10                                    | 10                 | 20 | 6                                    | 12 |                      |         |
| ≥10                                        | 30                 | 60 | 38                                   | 76 |                      |         |
| Mean ± SD                                  | 13.10 ± 8.43       |    | 13.0 ± 7.63                          |    | U=1235               | 0.92    |
| Family history of cardiovascular diseases  |                    |    |                                      |    |                      |         |
| No                                         | 33                 | 66 | 39                                   | 78 | χ <sup>2</sup> =1.79 | 0.181   |
| Yes                                        | 17                 | 34 | 11                                   | 22 |                      |         |
| Family history of diabetes mellitus        |                    |    |                                      |    |                      |         |
| No                                         | 31                 | 62 | 37                                   | 74 | χ <sup>2</sup> =1.65 | 0.198   |
| Yes                                        | 19                 | 38 | 13                                   | 26 |                      |         |
| Smoking                                    | 27                 | 54 | 20                                   | 40 | χ <sup>2</sup> =1.97 | 0.161   |
| Smoking index (Mean ± SD)                  | 678.06 ± 255.64    |    | 735.47 ± 409.24                      |    | U= 239.5             | 0.634   |
| <b>Anthropometric measurements</b>         |                    |    |                                      |    |                      |         |
| BMI (kg/m <sup>2</sup> )                   |                    |    |                                      |    |                      |         |
| Normal (18.5–24.9)                         | 13                 | 26 | 6                                    | 12 | χ <sup>2</sup> =8.20 | 0.017*  |
| Overweight (25–29.9)                       | 26                 | 52 | 20                                   | 40 |                      |         |
| Obese (≥ 30)                               | 11                 | 22 | 24                                   | 48 |                      |         |
| Mean ± SD.                                 | 26.66 ± 3.67       |    | 30.13 ± 4.38                         |    | t=4.292*             | <0.001* |
| Waist circumference (Mean ± SD)            | 94.88 ± 11.59      |    | 101.9 ± 12.07                        |    | t=2.975*             | 0.004*  |
| Waist \ height (Mean ± SD)                 | 0.53 ± 0.06        |    | 0.58 ± 0.07                          |    | t=3.585*             | 0.001*  |
| <b>Blood pressure (mmHg)</b>               |                    |    |                                      |    |                      |         |
| Normal (< 120/80 mmHg)                     | 11                 | 22 | 15                                   | 30 | χ <sup>2</sup> =2.47 | 0.482   |
| Elevated (120-129/<80 mmHg)                | 17                 | 34 | 11                                   | 22 |                      |         |
| High blood pressure 1 (130-139/80-90 mmHg) | 15                 | 30 | 14                                   | 28 |                      |         |
| High blood pressure 2 (>140/90 mmHg)       | 7                  | 14 | 10                                   | 20 |                      |         |
| Systolic blood pressure (Mean ± SD)        | 131.18 ± 14.06     |    | 124.3 ± 15.84                        |    | t=2.30*              | 0.024*  |
| Diastolic blood pressure (Mean ± SD)       | 77.70 ± 10.01      |    | 80.34 ± 9.61                         |    | t=1.35               | 0.182   |

χ<sup>2</sup>: Chi square test

FET: Fisher Exact test

MC: Monte Carlo

t: Student t-test

U: Mann Whitney test

p: p value for comparing between the studied groups; statistically significant at p ≤ 0.05



Table 2: Biochemical changes and oxidative stress among the enrolled divers and marine seafarers

|                                       | Divers<br>(n = 50) | Marines and<br>Seafarers<br>(n = 50) | Test of Sig. | <i>p</i> |
|---------------------------------------|--------------------|--------------------------------------|--------------|----------|
| <b>Oxidative stress biomarkers</b>    |                    |                                      |              |          |
| MDA (0.67-2.44 μm/l)                  |                    |                                      |              |          |
| Min. – Max.                           | 4.90 – 22.0        | 2.50 – 15.0                          |              |          |
| Mean ± SD.                            | 13.54 ± 4.08       | 6.31 ± 2.66                          | U= 183.50*   | <0.001*  |
| TAS (0.5-2 mmol/dl)                   |                    |                                      |              |          |
| Min. – Max.                           | 0.29 – 2.0         | 0.50 – 2.30                          |              |          |
| Mean ± SD.                            | 0.84 ± 0.43        | 1.40 ± 0.45                          | U= 444.50*   | <0.001*  |
| GST (3.38 μm/dl)                      |                    |                                      |              |          |
| Min. – Max.                           | 0.50 – 6.20        | 2.10 – 12.30                         |              |          |
| Mean ± SD.                            | 2.42 ± 1.29        | 6.43 ± 2.40                          | U= 153.50*   | <0.001*  |
| GSH (24-36 IU/ml)                     |                    |                                      |              |          |
| Range                                 | 8.50 – 27.50       | 16.40 – 33.0                         |              |          |
| Mean ± SD.                            | 15.22 ± 4.15       | 24.34 ± 3.37                         | U= 145.00*   | <0.001*  |
| GR (IU/ml)                            |                    |                                      |              |          |
| Min. – Max.                           | 5.90 – 25.20       | 14.30 – 40.0                         |              |          |
| Mean ± SD.                            | 11.66 ± 4.70       | 24.08 ± 5.16                         | U= 104.50*   | <0.001*  |
| GPx (up-8 U/ml)                       |                    |                                      |              |          |
| Min. – Max.                           | 0.01 – 0.35        | 0.05 – 0.51                          |              |          |
| Mean ± SD.                            | 0.11 ± 0.09        | 0.24 ± 0.12                          | U= 406.00*   | <0.001*  |
| SOD (100 U/ml)                        |                    |                                      |              |          |
| Min. – Max.                           | 98.0 – 211.0       | 144.0 – 345.0                        |              |          |
| Mean ± SD.                            | 140.5 ± 27.59      | 243.2 ± 40.19                        | t= 14.894*   | <0.001*  |
| CAT (IU/ml)                           |                    |                                      |              |          |
| Range                                 | 214.0 – 440.0      | 265.0 – 562.0                        |              |          |
| Mean ± SD.                            | 298.7 ± 58.20      | 436.2 ± 76.23                        | t= 10.136*   | <0.001*  |
| <b>Trace metal</b>                    |                    |                                      |              |          |
| Fe <sup>+</sup> (65-180 μm/dl).       |                    |                                      |              |          |
| Min. – Max.                           | 65.0 – 251.0       | 25.0 – 181.0                         |              |          |
| Mean ± SD.                            | 147.6 ± 38.08      | 101.1 ± 38.17                        | t= 6.101*    | <0.001*  |
| Cu <sup>+</sup> (70-150 μm/dl).       |                    |                                      |              |          |
| Min. – Max.                           | 132.0 – 449.0      | 53.0 – 169.0                         |              |          |
| Mean ± SD.                            | 271.3 ± 75.01      | 100.8 ± 30.20                        | t= 14.908*   | <0.001*  |
| Zn <sup>+</sup> (70-100 μm/dl).       |                    |                                      |              |          |
| Min. – Max.                           | 40.0 – 189.0       | 75.0 – 163.0                         |              |          |
| Mean ± SD.                            | 85.52 ± 27.37      | 116.6 ± 21.95                        | t= 6.264*    | <0.001*  |
| <b>Electrolytes</b>                   |                    |                                      |              |          |
| Ca <sup>+</sup> (9-11 mmol/L)         |                    |                                      |              |          |
| Mean ± SD.                            | 9.44±0.52          | 9.19±0.60                            | t= 2.197*    | 0.030*   |
| K <sup>+</sup> (3.5-5.2 mmol/L)       |                    |                                      |              |          |
| Mean ± SD.                            | 4.20 ± 0.39        | 4.26 ± 0.34                          | t= 0.936     | 0.352    |
| Na <sup>+</sup> (135-145 mmol/L)      |                    |                                      |              |          |
| Mean ± SD.                            | 141.72±3.53        | 143.26±3.99                          | t= 2.043*    | 0.044*   |
| Na <sup>+</sup> /K <sup>+</sup> ratio |                    |                                      |              |          |
| Mean ± SD.                            | 34.04 ± 3.08       | 33.82 ± 3.06                         | t= 0.359     | 0.72     |
| <b>Metabolic tests</b>                |                    |                                      |              |          |
| FBS (56-110 mg %)                     |                    |                                      |              |          |
| Mean ± SD.                            | 89.0 ± 12.46       | 100.5 ± 29.03                        | t= 2.574*    | 0.012*   |
| Urea (20-50 ml / dl)                  |                    |                                      |              |          |
| Min. – Max.                           | 23.0 – 36.0        | 21.0 – 42.0                          |              |          |
| Mean ± SD.                            | 28.74 ± 3.49       | 30.28 ± 5.38                         | t= 1.698     | 0.093    |
| Creatinine (0.5-1.5 ml /dl)           |                    |                                      |              |          |
| Min. – Max.                           | 0.61 – 1.0         | 0.60 – 1.10                          |              |          |
| Mean ± SD.                            | 0.78 ± 0.10        | 0.80 ± 0.12                          | t= 0.587     | 0.559    |
| Uric Acid (2.5-6 ml /dl)              |                    |                                      |              |          |
| Min. – Max.                           | 3.0 – 7.0          | 3.0 – 7.0                            |              |          |
| Mean ± SD.                            | 4.94 ± 1.02        | 5.0 ± 0.90                           | t= 0.312     | 0.756    |
| SGOT (up to 40 ml /dl)                |                    |                                      |              |          |
| Min. – Max.                           | 13.0 – 35.0        | 12.0 – 38.0                          |              |          |
| Mean ± SD.                            | 23.72 ± 6.76       | 25.06 ± 7.54                         | t= 0.935     | 0.352    |
| SGPT (up to 40 ml /dl)                |                    |                                      |              |          |
| Min. – Max.                           | 13.0 – 39.0        | 11.0 – 56.0                          |              |          |
| Mean ± SD.                            | 22.60 ± 5.80       | 24.66 ± 8.77                         | t= 1.386     | 0.169    |
| Bilirubin (0.5-1.5 ml /dl)            |                    |                                      |              |          |
| Min. – Max.                           | 0.46 – 1.05        | 0.44 – 1.0                           |              |          |
| Mean ± SD.                            | 0.68 ± 0.13        | 0.72 ± 0.12                          | t= 1.916     | 0.058    |
| <b>Lipid profile</b>                  |                    |                                      |              |          |
| Triglycerides (50-150 mg /dl)         |                    |                                      |              |          |
| Mean ± SD.                            | 115.3 ± 26.41      | 119.2 ± 26.54                        | t= 0.748     | 0.456    |

|                                    |                   |                   |           |        |
|------------------------------------|-------------------|-------------------|-----------|--------|
| Total cholesterol (125-200 mg /dl) |                   |                   |           |        |
| Mean $\pm$ SD.                     | 182.3 $\pm$ 19.66 | 177.5 $\pm$ 20.84 | t= 1.19   | 0.237  |
| HDL-C (40-80 mg/dl)                |                   |                   |           |        |
| Mean $\pm$ SD.                     | 41.46 $\pm$ 4.01  | 39.34 $\pm$ 4.34  | t= 2.538* | 0.013* |
| LDL-C (85-125 mg/dl)               |                   |                   |           |        |
| Mean $\pm$ SD.                     | 117.6 $\pm$ 17.31 | 114.3 $\pm$ 17.79 | t= 0.952  | 0.344  |

t: Student *t*-test

U: Mann Whitney test

p: *p* value for comparing between the studied groups; statistically significant at  $p \leq 0.05$

Table 3: Quantitative and qualitative electrocardiogram changes among the enrolled divers and marine seafarers

| ECG                                 | Divers<br>(n = 50) |      | Marines and<br>Seafarers<br>(n = 50) |     | Test of Sig.        | p       |
|-------------------------------------|--------------------|------|--------------------------------------|-----|---------------------|---------|
|                                     | No.                | %    | No.                                  | %   |                     |         |
| <b>Overall ECG changes</b>          |                    |      |                                      |     |                     |         |
| Yes                                 | 28                 | 56   | 43                                   | 86  | $\chi^2 = 10.928^*$ | <0.001* |
| No                                  | 22                 | 44   | 7                                    | 14  |                     |         |
| <b>Qualitative variations~</b>      |                    |      |                                      |     |                     |         |
| Right bundle branch block (RBBB)    | 2                  | 4.0  | 1                                    | 2.0 |                     |         |
| Left ventricular hypertrophy (LVH)  | 9                  | 18.0 | 3                                    | 6.0 |                     |         |
| Sinus bradycardia                   | 11                 | 22.0 |                                      |     |                     |         |
| Right axis deviation                | 1                  | 2.0  |                                      |     |                     |         |
| Prolonged QT interval               | 1                  | 2.0  |                                      |     |                     |         |
| Prolonged P-R interval              | 4                  | 8.0  |                                      |     |                     |         |
| Burgada like syndrome               | 1                  | 2.0  |                                      |     |                     |         |
| Left axis deviation                 | 7                  | 14.0 | 2                                    | 4.0 |                     |         |
| Early repolarization                | 7                  | 14.0 | 1                                    | 2.0 |                     |         |
| P-mitrale                           | 4                  | 8.0  |                                      |     |                     |         |
| Extrasystole                        | 1                  | 2.0  |                                      |     |                     |         |
| 1 <sup>st</sup> degree heart block  | 4                  | 8.0  |                                      |     |                     |         |
| Intraventricular conduction defect  | 3                  | 6.0  |                                      |     |                     |         |
| P-pulmonale                         | 2                  | 4.0  | 3                                    | 6.0 |                     |         |
| T wave inversion                    | 2                  | 4.0  |                                      |     |                     |         |
| Tented T wave                       | 2                  | 4.0  | 2                                    | 4.0 |                     |         |
| Sinus tachycardia                   | 1                  | 2.0  | 3                                    | 6.0 |                     |         |
| <b>Quantitative variations (</b>    |                    |      |                                      |     |                     |         |
|                                     | <b>Mean ± SD</b>   |      | <b>Mean ± SD</b>                     |     |                     |         |
| Rate/min (beat/ min)                | 68.90 ± 16.06      |      | 78.16 ± 15.42                        |     | t=2.942*            | 0.004*  |
| P-R interval (msec)                 | 168.8 ± 28.62      |      | 140.8 ± 21.37                        |     | U=537.0*            | <0.001* |
| QRS Complex (msec)                  | 85.20 ± 20.92      |      | 75.60 ± 17.75                        |     | U=933.5*            | 0.022*  |
| QT WAVE (msec)                      | 363.8 ± 29.75      |      | 366.7 ± 34.53                        |     | t=0.444             | 0.658   |
| Corrected QT Interval               | 412.5 ± 37.76      |      | 392.1 ± 22.67                        |     | t=3.282*            | 0.002*  |
| Sokolov–Lyon score [S1/2+R5/6 (mV)] | 22.68 ± 6.18       |      | 12.50 ± 4.09                         |     | t=9.713*            | <0.001* |
| R-R MIN (msec)                      | 810.68 ± 120.04    |      | 750.68 ± 110.52                      |     | t=2.547*            | 0.012*  |
| R-R MAX (msec)                      | 930.92 ± 14.04     |      | 830.12 ± 110.72                      |     | t=4.174*            | <0.001* |
| R-R mean (msec)                     | 870.8 ± 120.68     |      | 790.4 ± 110.44                       |     | t=3.476*            | <0.001* |
| R-R SD (msec)                       | 60.2 ± 20.88       |      | 30.72 ± 10.92                        |     | t=5.207*            | <0.001* |

ECG: Electrocardiogram

t: Student t-test

U: Mann Whitney test

p: p value for comparing between the studied groups; statistically significant at  $p \leq 0.05$

~More than one change could be present in the same case
